# Supplementary material
Source: Springer Nature journal article supplement (https://www.springermedizin.de/resource/supplementary/13017_2011_213_MOESM3_ESM.pdf/9635714)

Major shot injuries in 457 patients

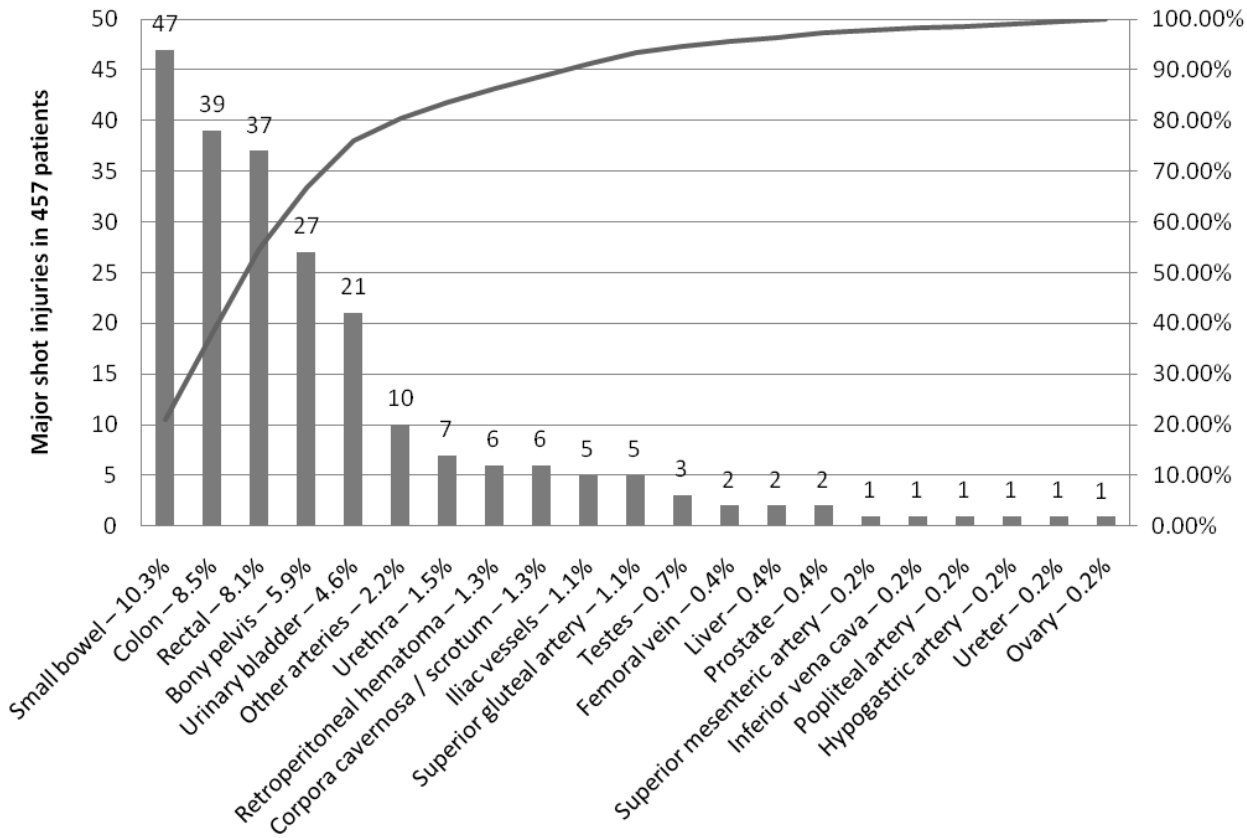

Supplement: MOESM3 [file 9635714]
